# Supplementary material
Source: Springer Nature journal article supplement (https://www.springermedizin.de/resource/supplementary/13058_2014_3396_MOESM4_ESM.pdf/9704088)
Supplement: MOESM4 [file 9704088]

Luminal

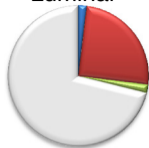

Luminal A

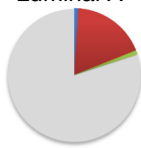

Luminal B

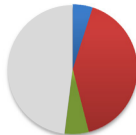

Her2

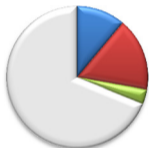

TNBC

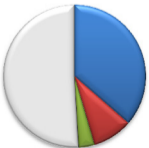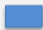

RB deletion/mutation/reduced expression

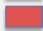

Cyclin D1 amplification/overexpression

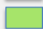

CDKN2A deletion/mutation
